# Supplementary material
Source: PubMed Central journal article supplement (PMC3246281)
Supplement: NIHMS336801-supplement-1.pdf [file NIHMS336801-supplement-1.pdf]

**Supplemental Material**

**Effects of Ambient Pollen Concentrations on Frequency and Severity of Asthma Symptoms**

**Among a Cohort of Asthmatic Children**

**Curt T. DellaValle, Elizabeth W. Triche, Brian P. Leaderer, Michelle L. Bell**

eFigure 1. Average Distribution of Pollens Over Entire Study Region: 2001

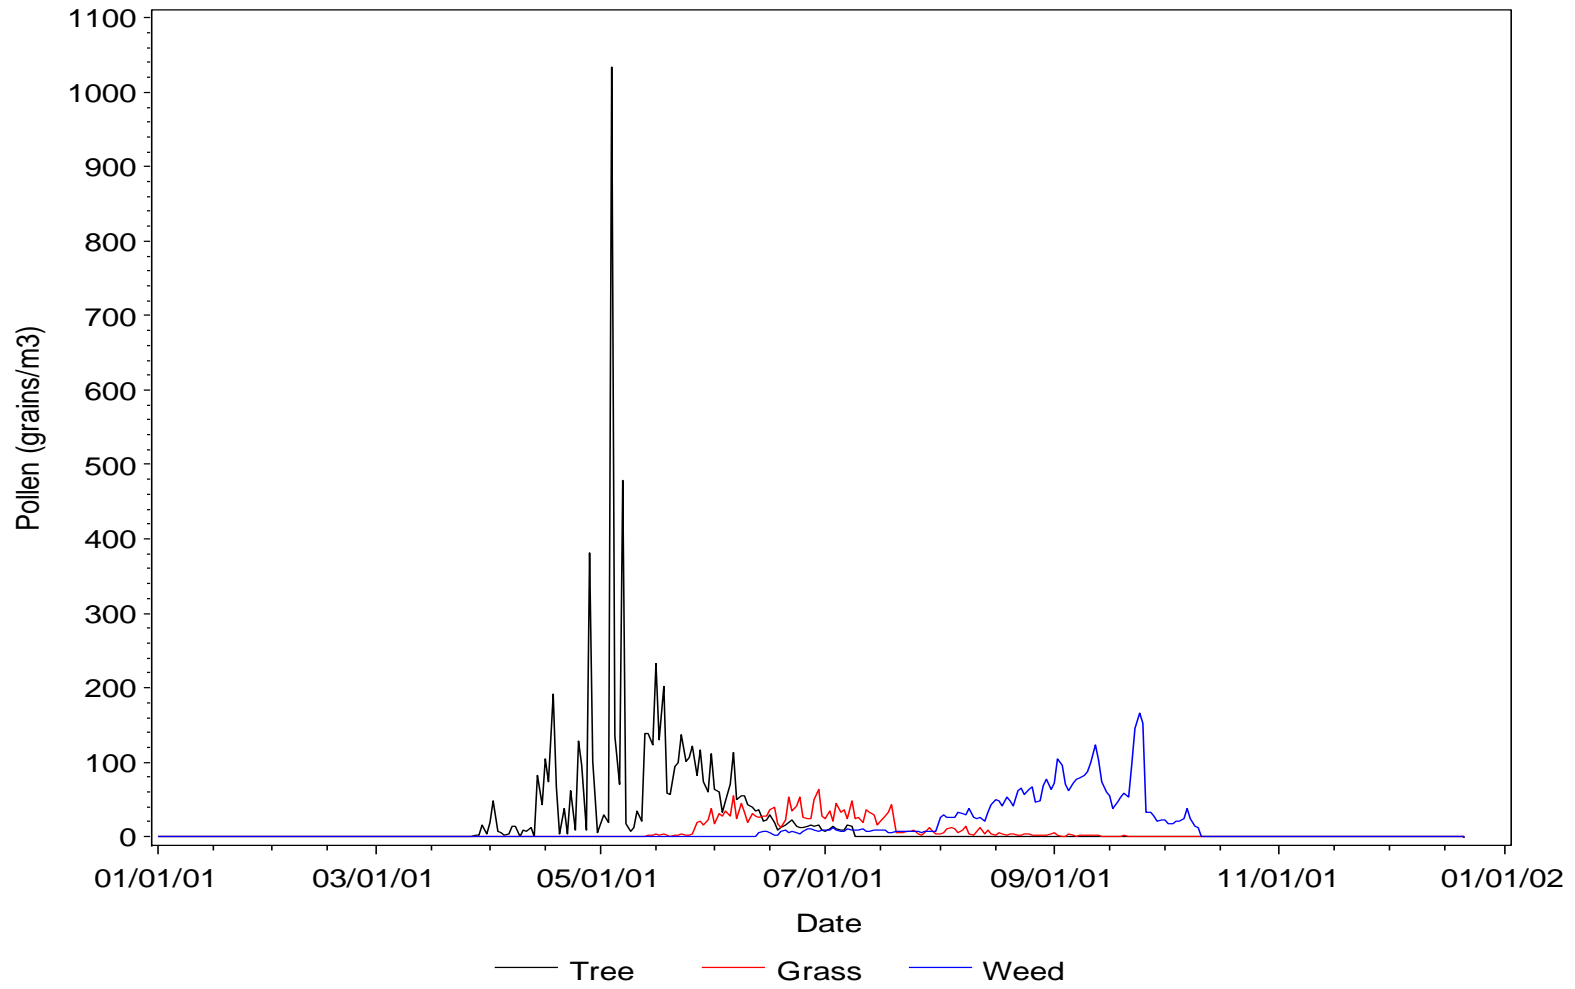

*e*Table 1. Pearson Correlation Coefficients for Maximum Temperature and Criteria Pollutants

|                     | NO <sub>2</sub> | O <sub>3</sub> 8-hr | O <sub>3</sub> 1-hr | PM <sub>2.5</sub> | SO <sub>2</sub> |
|---------------------|-----------------|---------------------|---------------------|-------------------|-----------------|
| Maximum Temperature | -0.20           | 0.58                | 0.60                | 0.11              | -0.47           |
| NO <sub>2</sub>     |                 | 0.23                | 0.25                | 0.60              | 0.71            |
| O <sub>3</sub> 8-hr |                 |                     | 0.89                | 0.52              | 0.01            |
| O <sub>3</sub> 1-hr |                 |                     |                     | 0.59              | 0.05            |
| PM <sub>2.5</sub>   |                 |                     |                     |                   | 0.49            |
